# Supplementary material for: Risk Assessment of (Herbal) Teas Containing Pyrrolizidine Alkaloids (PAs) Based on Margin of Exposure Approach and Relative Potency (REP) Factors
Source: MDPI journal article supplement (doi:10.3390/foods11192946), 2022-09-21
Supplement: s1 [file s1]

Supporting data 1 to the Manuscript:

**Risk assessment of (herbal) teas containing pyrrolizidine alkaloids (PAs) based on margin of exposure approach and relative potency (REP) factors**

Lu Chen<sup>2,a</sup>, Qian Zhang<sup>1,a</sup>, Ziwei Yi<sup>1</sup>, Yu Chen<sup>1</sup>, Weihai Xiao<sup>1</sup>, Dan Su<sup>3</sup>, Wenbiao Shi<sup>1\*</sup>

<sup>1</sup> Department of Nutrition and Health, Chinese Agriculture University, Beijing 100091, China

<sup>2</sup> Institute of Quality Standards and Testing Technology for Agro-Products, Chinese Academy of Agricultural Sciences; Key Laboratory of Agri-food Quality and Safety, Ministry of Agriculture and Rural Affairs, Beijing 100081, China

<sup>3</sup> Department of Chemistry and Chemical Biology, Cornell University, Ithaca, NY 14850, USA

<sup>a</sup> These authors contributed equally to this study and share first authorship

\* Corresponding author: Wenbiao Shi

Department of Nutrition and Health, Chinese Agriculture University.

Beijing, 100083, China

Phone: +86 010 62738589

Email: [wenbiao.shi@cau.edu.cn](mailto:wenbiao.shi@cau.edu.cn)

## Supplemental tables

**Table S1.** Mass parameters for individual PA compounds.

| Compound                    | Precursor ion (m/z) | Cone voltage (V) | Product ion 1 (m/z) | Product ion 2 (m/z) | Product ion 3 (m/z) | RT (min) |
|-----------------------------|---------------------|------------------|---------------------|---------------------|---------------------|----------|
| 7-Acetylintermedine         | 342.2               | 30               | 120                 | 180                 | 94                  | 8.80     |
| 7-Acetylintermedine N-oxide | 358.2               | 30               | 137                 | 214                 | 180                 | 5.90     |
| 7-Acetyllycopsamine         | 342.2               | 30               | 120                 | 180                 | 94                  | 8.85     |
| 7-Acetyllycopsamine N-oxide | 358.2               | 30               | 137                 | 214                 | 180                 | 5.90     |
| Acetylpetasitenine          | 424.2               | 30               | 122                 | 168                 | 150                 | 9.10     |
| Adonifoline                 | 366.2               | 40               | 94                  | 338                 | 120                 | 5.55     |
| Amabiline                   | 284.2               | 30               | 122                 | 140                 | 94                  | 3.30     |
| Atropine                    | 290.2               | 40               | 124                 | 93                  | 94                  | 4.15     |
| Echimidine                  | 398.2               | 30               | 120                 | 220                 | 83                  | 10.55    |
| Echimidine N-oxide          | 414.2               | 30               | 254                 | 352                 | 94                  | 7.40     |
| Echinatine                  | 300.2               | 30               | 138                 | 156                 | 94                  | 6.45     |
| Echinatine N-oxide          | 316.2               | 30               | 111                 | 172                 | 94                  | 3.75     |
| Erucifoline                 | 350.2               | 40               | 94                  | 120                 | 138                 | 7.30     |
| Erucifoline N-oxide         | 366.2               | 40               | 94                  | 118                 | 120                 | 3.25     |
| Europine                    | 330.2               | 30               | 94                  | 138                 | 156                 | 6.15     |
| Europine N-oxide            | 346.2               | 30               | 172                 | 111                 | 256                 | 3.55     |
| Florosene                   | 424.2               | 30               | 122                 | 168                 | 150                 | 8.40     |
| Heliosupine                 | 398.2               | 30               | 120                 | 220                 | 336                 | 10.40    |
| Heliosupine N-oxide         | 414.2               | 30               | 94                  | 254                 | 138                 | 7.10     |
| Heliotrine                  | 314.2               | 30               | 138                 | 156                 | 94                  | 8.10     |
| Heliotrine N-oxide          | 330.2               | 30               | 111                 | 172                 | 94                  | 5.50     |
| Indicine N-oxide            | 316.2               | 30               | 94                  | 172                 | 111                 | 3.55     |
| Integerrimine               | 336.2               | 40               | 94                  | 120                 | 138                 | 9.95     |
| Integerrimine N-oxide       | 352.2               | 40               | 94                  | 120                 | 136                 | 6.50     |
| Intermedine                 | 300.2               | 30               | 94                  | 156                 | 138                 | 5.45     |
| Intermedine N-oxide         | 316.2               | 30               | 94                  | 172                 | 111                 | 3.40     |
| Jacobine                    | 352.2               | 40               | 120                 | 155                 | 94                  | 7.65     |
| Jacobine N-oxide            | 368.2               | 40               | 120                 | 296                 | 119                 | 4.40     |
| Jacoline                    | 370.2               | 40               | 94                  | 138                 | 120                 | 5.35     |
| Jacoline N-oxide            | 386.2               | 40               | 94                  | 120                 | 138                 | 2.60     |
| Jaconine                    | 388.2               | 40               | 94                  | 120                 | 138                 | 8.75     |
| Jaconine N-oxide            | 404.2               | 40               | 94                  | 120                 | 118                 | 4.90     |
| Lasiocarpine                | 412.2               | 30               | 120                 | 220                 | 336                 | 11.25    |
| Lasiocarpine N-oxide        | 428.2               | 30               | 138                 | 254                 | 94                  | 8.25     |
| Lycopsamine                 | 300.2               | 30               | 94                  | 156                 | 138                 | 5.50     |

|                        |       |    |     |     |     |       |
|------------------------|-------|----|-----|-----|-----|-------|
| Lycopsamine N-oxide    | 316.2 | 30 | 94  | 172 | 111 | 3.45  |
| Merensskine            | 388.2 | 40 | 94  | 120 | 138 | 9.05  |
| Merensskine N-oxide    | 404.2 | 40 | 94  | 120 | 118 | 5.10  |
| Merepoxine             | 352.2 | 40 | 94  | 120 | 138 | 8.20  |
| Merepoxine N-oxide     | 368.2 | 40 | 94  | 120 | 119 | 5.00  |
| Monocrotaline          | 326.2 | 40 | 94  | 120 | 121 | 5.60  |
| Monocrotaline N-oxide  | 342.2 | 40 | 120 | 137 | 94  | 2.45  |
| Neosenkirkine          | 366.2 | 30 | 122 | 168 | 150 | 6.85  |
| Otosenine              | 382.2 | 30 | 122 | 168 | 150 | 4.55  |
| Petasitenine           | 382.2 | 30 | 122 | 168 | 150 | 5.90  |
| Retrorsine             | 352.2 | 40 | 94  | 120 | 138 | 8.55  |
| Retrorsine N-oxide     | 368.2 | 40 | 94  | 120 | 119 | 5.40  |
| Riddelliine            | 350.2 | 40 | 94  | 120 | 138 | 7.80  |
| Riddelliine N-oxide    | 366.2 | 40 | 94  | 118 | 120 | 4.50  |
| Rinderine              | 300.2 | 30 | 138 | 156 | 94  | 6.60  |
| Rinderine N-oxide      | 316.2 | 30 | 111 | 172 | 94  | 3.85  |
| Sceleratine            | 370.2 | 40 | 94  | 138 | 120 | 5.75  |
| Sceleratine N-oxide    | 386.2 | 40 | 94  | 120 | 138 | 2.80  |
| Scopolamine            | 304.2 | 30 | 138 | 156 | 94  | 2.95  |
| Senecionine            | 336.2 | 40 | 94  | 120 | 138 | 10.25 |
| Senecionine N-oxide    | 352.2 | 40 | 94  | 120 | 136 | 6.70  |
| Seneciphylline         | 334.2 | 40 | 120 | 138 | 94  | 9.25  |
| Seneciphylline N-oxide | 350.2 | 40 | 94  | 138 | 118 | 5.80  |
| Senecivernine          | 336.2 | 40 | 94  | 120 | 138 | 10.40 |
| Senecivernine N-oxide  | 352.2 | 40 | 94  | 120 | 136 | 6.75  |
| Senkirkine             | 366.2 | 30 | 122 | 168 | 150 | 7.00  |
| Spartiodine            | 334.2 | 40 | 120 | 138 | 94  | 8.95  |
| Spartiodine N-oxide    | 350.2 | 40 | 94  | 120 | 118 | 5.70  |
| Supinine               | 284.2 | 30 | 122 | 140 | 110 | 6.90  |
| Supinine N-oxide       | 300.2 | 30 | 120 | 156 | 140 | 4.95  |
| Trichodesmine          | 354.2 | 40 | 120 | 222 | 121 | 8.65  |
| Trichodesmine N-oxide  | 370.2 | 40 | 137 | 238 | 94  | 5.30  |
| Usaramine              | 352.2 | 40 | 94  | 120 | 138 | 8.30  |
| Usaramine N-oxide      | 368.2 | 40 | 94  | 120 | 119 | 5.25  |

**Table S2.** The REP factors of individual PA and their *N*-ox congeners in this study according to Merz and Schrenk (2016) [1].

| PA and their <i>N</i> -ox congeners          | REP factor | PA and their <i>N</i> -ox congeners | REP factor |
|----------------------------------------------|------------|-------------------------------------|------------|
| 7-Acetylintermedine                          | 0.1        | Lycopsamine <i>N</i> -ox            | 0.01       |
| 7-Acetyllycopsamine                          | 0.1        | Merenskinine                        | 1          |
| 7-Acetyllycopsamine/intermedine <i>N</i> -ox | 0.1        | Merenskinine <i>N</i> -ox           | 1          |
| Acetylpetasitenine                           | 1          | Merepoxine                          | 1          |
| Adonifoline                                  | 1          | Merepoxine <i>N</i> -ox             | 1          |
| Amabiline                                    | 0.01       | Monocrotaline                       | 1          |
| Atropine                                     | 0          | Monocrotaline <i>N</i> -ox          | 1          |
| Echimidine                                   | 0.1        | Neosenkirkine                       | 1          |
| Echimidine <i>N</i> -ox                      | 0.1        | Otosenine                           | 1          |
| Echinatine                                   | 0.3        | Petasitenine                        | 1          |
| Echinatine <i>N</i> -ox                      | 0.3        | Retrorsine                          | 1          |
| Erucifoline                                  | 1          | Retrorsine <i>N</i> -ox             | 1          |
| Erucifoline <i>N</i> -ox                     | 1          | Riddelliine                         | 1          |
| Europine                                     | 0.3        | Riddelliine <i>N</i> -ox            | 1          |
| Europine <i>N</i> -ox                        | 0.3        | Rinderine                           | 0.3        |
| Florosene                                    | 1          | Rinderine <i>N</i> -ox              | 0.3        |
| Heliosupine                                  | 1          | Sceleratine                         | 1          |
| Heliosupine <i>N</i> -ox                     | 1          | Sceleratine <i>N</i> -ox            | 1          |
| Heliotrine                                   | 0.3        | Scopolamine                         | 0          |
| Heliotrine <i>N</i> -ox                      | 0.3        | Senecionine                         | 1          |
| Indicine <i>N</i> -ox                        | 0.01       | Senecionine <i>N</i> -ox            | 1          |
| Integerrimine                                | 1          | Seneciphylline                      | 1          |
| Integerrimine <i>N</i> -ox                   | 1          | Seneciphylline <i>N</i> -ox         | 1          |
| Intermedine                                  | 0.01       | Senecivernine                       | 1          |
| Intermedine <i>N</i> -ox                     | 0.01       | Senecivernine <i>N</i> -ox          | 1          |
| Jacobine                                     | 1          | Senkirkine                          | 1          |
| Jacobine <i>N</i> -ox                        | 1          | Spartioidine                        | 1          |
| Jacoline                                     | 1          | Spartioidine <i>N</i> -ox           | 1          |
| Jacoline <i>N</i> -ox                        | 1          | Supinine                            | 0.01       |
| Jaconine                                     | 1          | Supinine <i>N</i> -ox               | 0.01       |
| Jaconine <i>N</i> -ox                        | 1          | Trichodesmine                       | 1          |
| Lasiocarpine                                 | 1          | Trichodesmine <i>N</i> -ox          | 1          |
| Lasiocarpine <i>N</i> -ox                    | 1          | Usaramine                           | 1          |
| Lycopsamine                                  | 0.01       | Usaramine <i>N</i> -ox              | 1          |

## References

1. Merz, K.-H.; Schrenk, D. Interim Relative Potency Factors for the Toxicological Risk Assessment of Pyrrolizidine Alkaloids in Food and Herbal Medicines. *Toxicol. Lett.* **2016**, *263*, 44–57, doi:10.1016/j.toxlet.2016.05.002.
